# Supplementary material for: A model of mercury cycling and isotopic fractionation in the ocean
Source: Copernicus journal article supplement (doi:10.5194/bg-15-6297-2018), 2018-10-26
Supplement: Supplementary file 1 [file bg-15-6297-2018-supplement.zip]

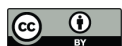

## *Supplement of*

# **A model of mercury cycling and isotopic fractionation in the ocean**

**David E. Archer and Joel D. Blum**

*Correspondence to:* David E. Archer (d-archer@uchicago.edu)

- bg-15-6297-2018-supplement-title-page.pdf
- src\_dist
  - DPHILA
  - MONITO
  - Makefile
  - VELO.ASC
  - advect.F
  - biology.F
  - bury.F
  - cc\_sed.F
  - common.archer
  - common.biocon
  - common.caco3c
  - common.chemis
  - common.ctrac
  - common.divers
  - common.hg
  - common.horvel
  - common.ingrid
  - common.postpr
  - common.production
  - common.seddebug
  - common.seddiag
  - common.sediment
  - common.thermo

- common.topogr
- common.wathic
- common.weather
- equivalence.include
- find\_Hg\_eq.F
- fort.39
- hg.F
- hg.F
- hg.old.F
- hg2.F
- initial.F
- lurch.F
- nearshore.F
- parameter.include
- parameter.sediment.include
- pools.F
- printout.cdf.F
- reacir.ascii.F
- sed\_main.F
- sediment.F
- surfch.F
- weather.F

The copyright of individual parts of the supplement might differ from the CC BY 4.0 License.
